# Supplementary figures and images for: Electronic structures and selective fluoride sensing features of Os(bpy)2(HL2−) and [{Os(bpy)2}2(μ-HL2−)]2+(H3L: 5-(1H-benzo[d]imidazol-2-yl)-1H-imidazole-4-carboxylic acid)
Source: Royal Society of Chemistry journal article supplement (doi:10.1039/c4dt01821d), 2014-01-01

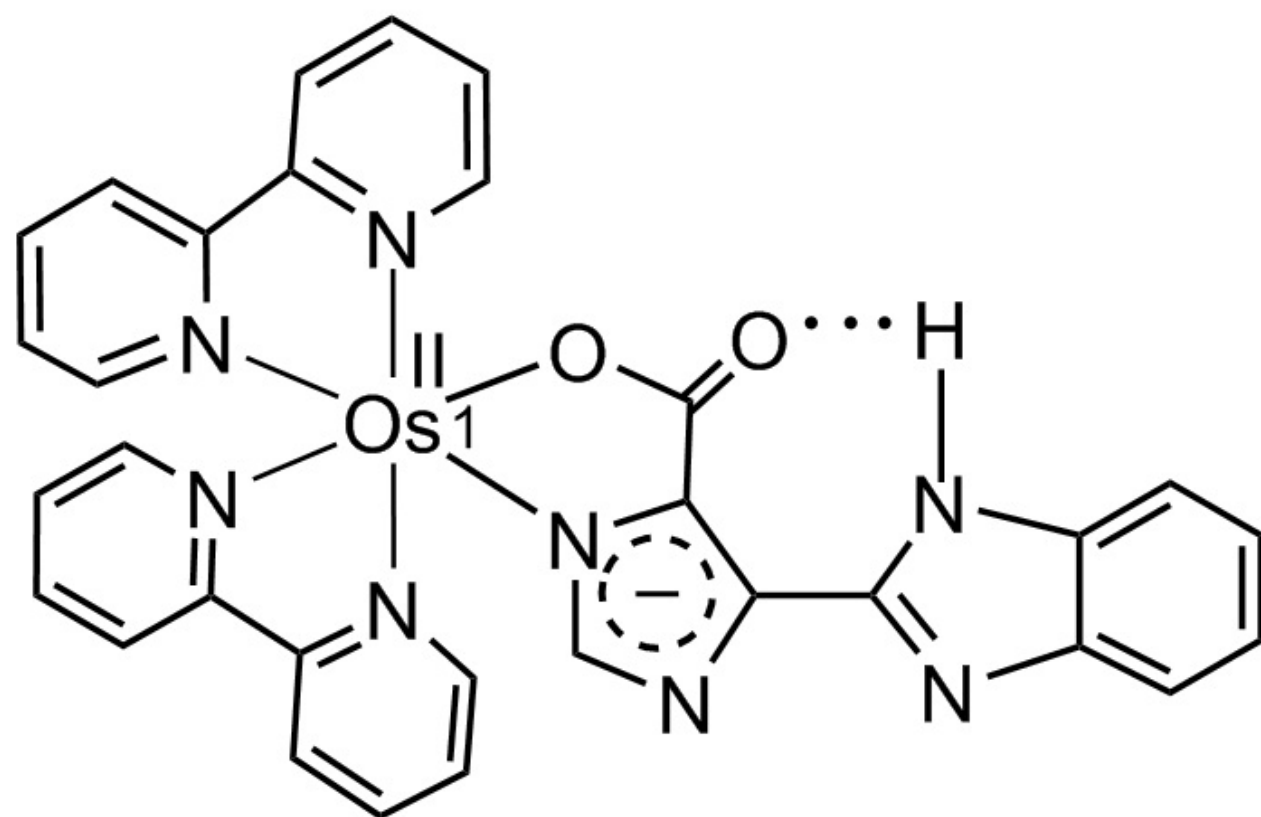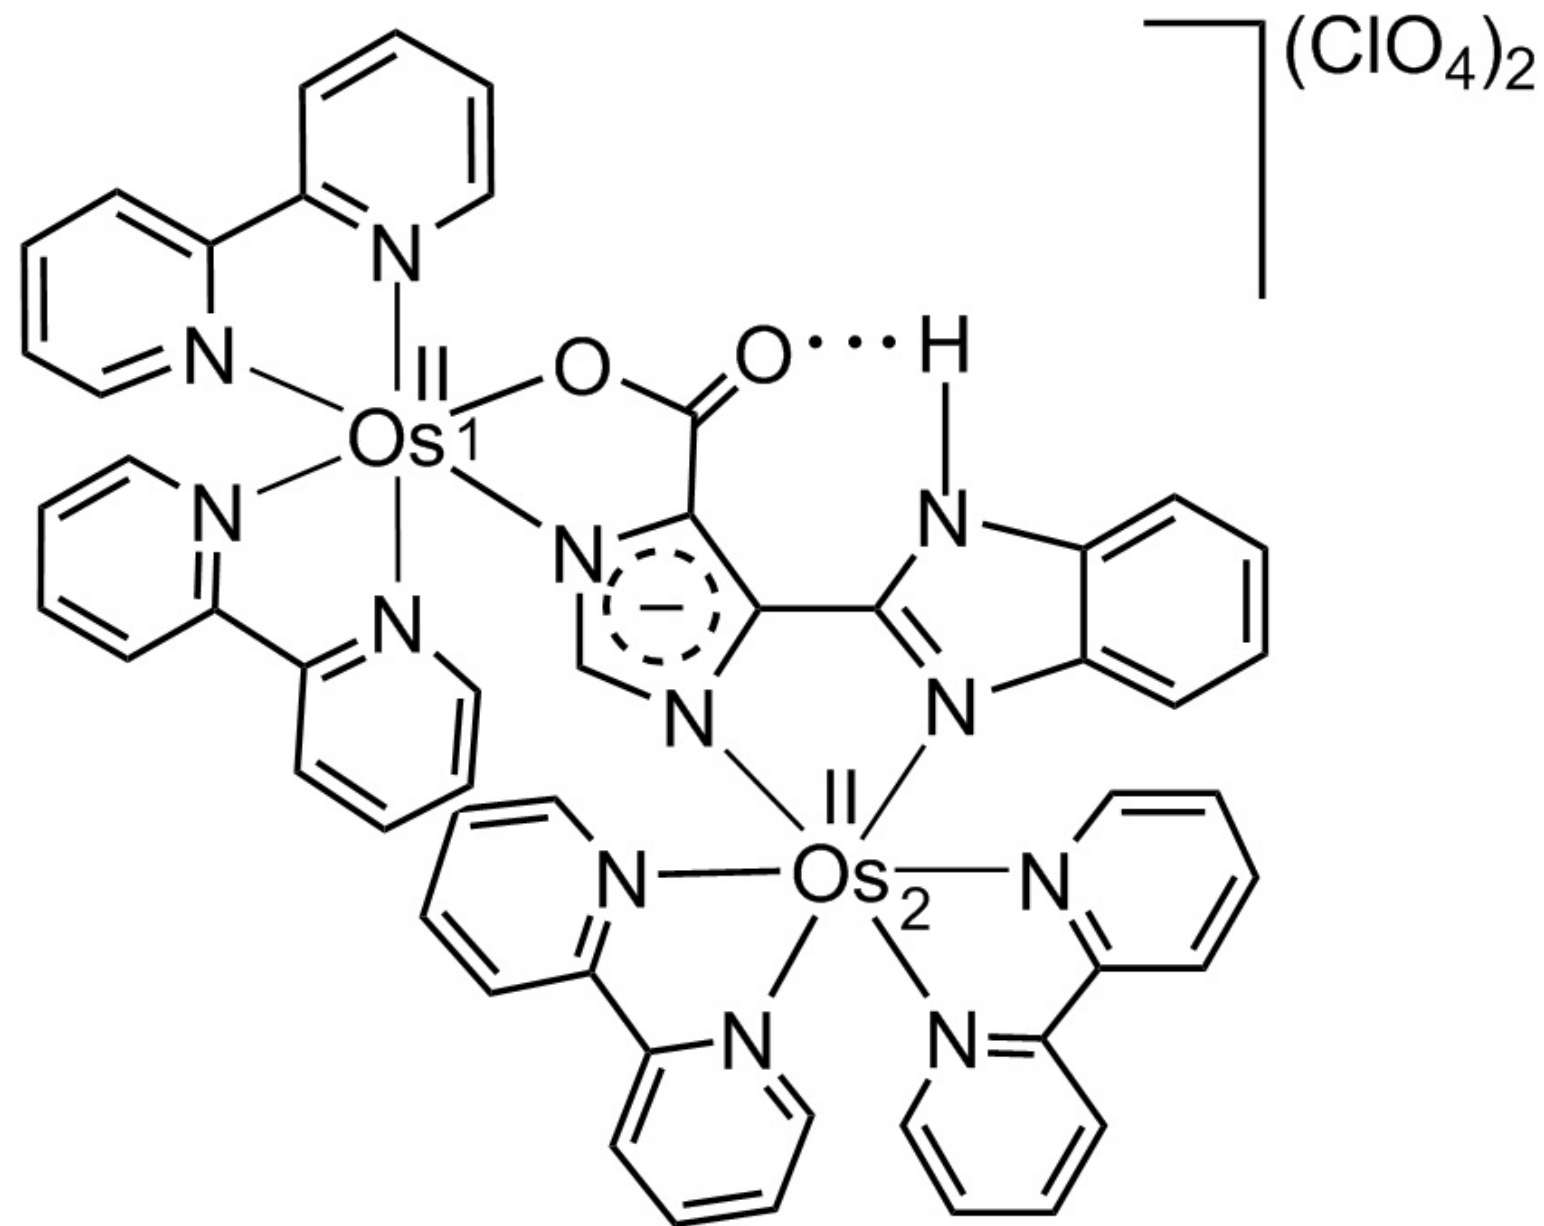

Supplement: c4dt01821d3.pdf [file c4dt01821d3.pdf]

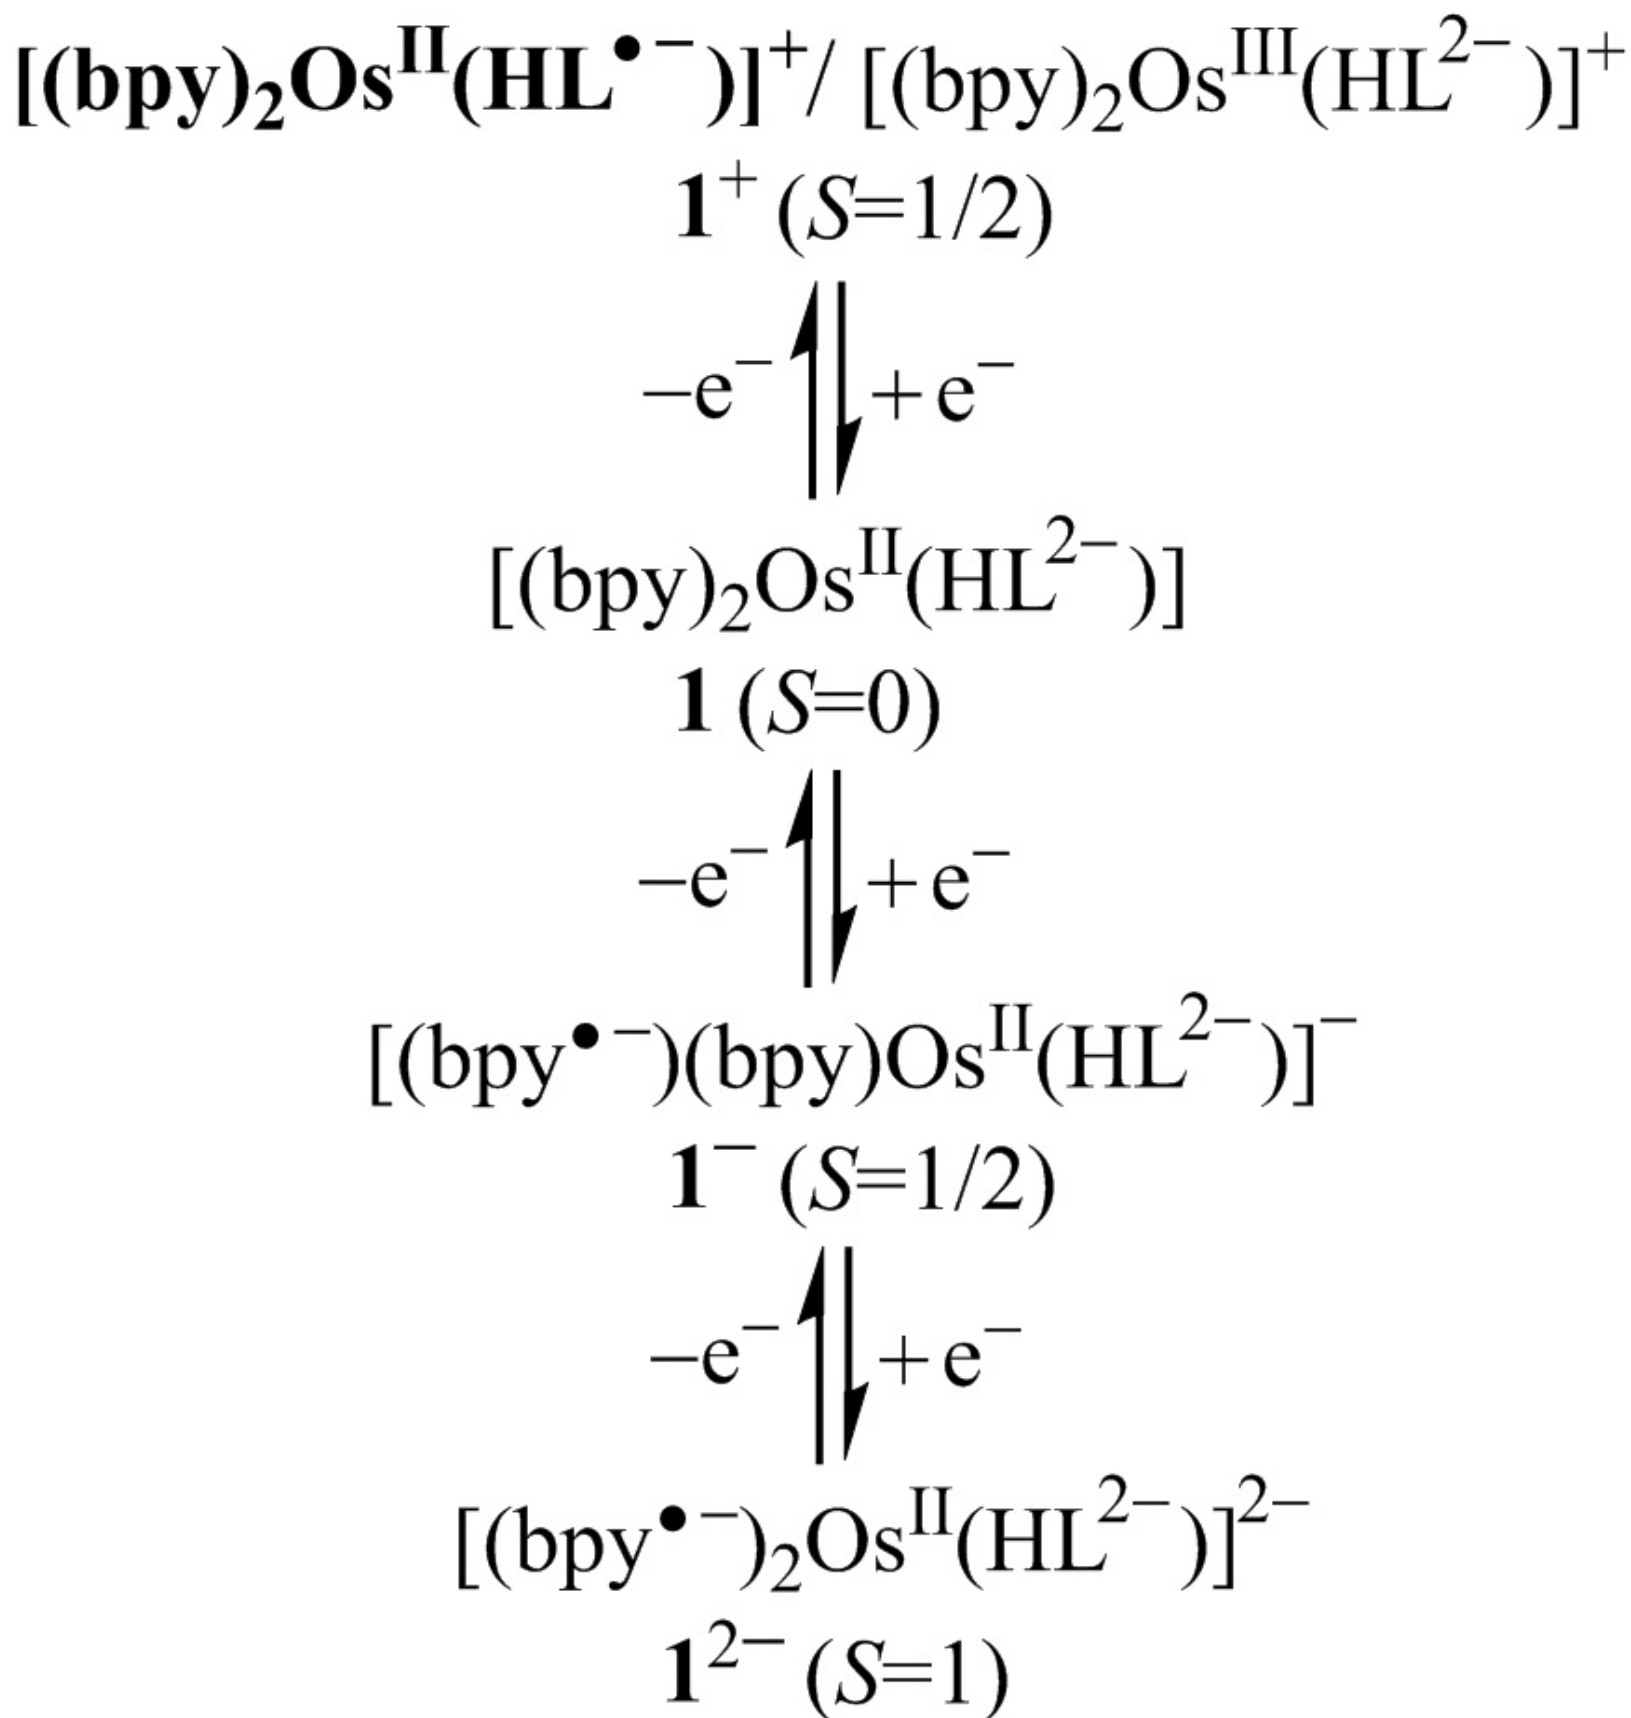

Supplement: c4dt01821d4.pdf [file c4dt01821d4.pdf]

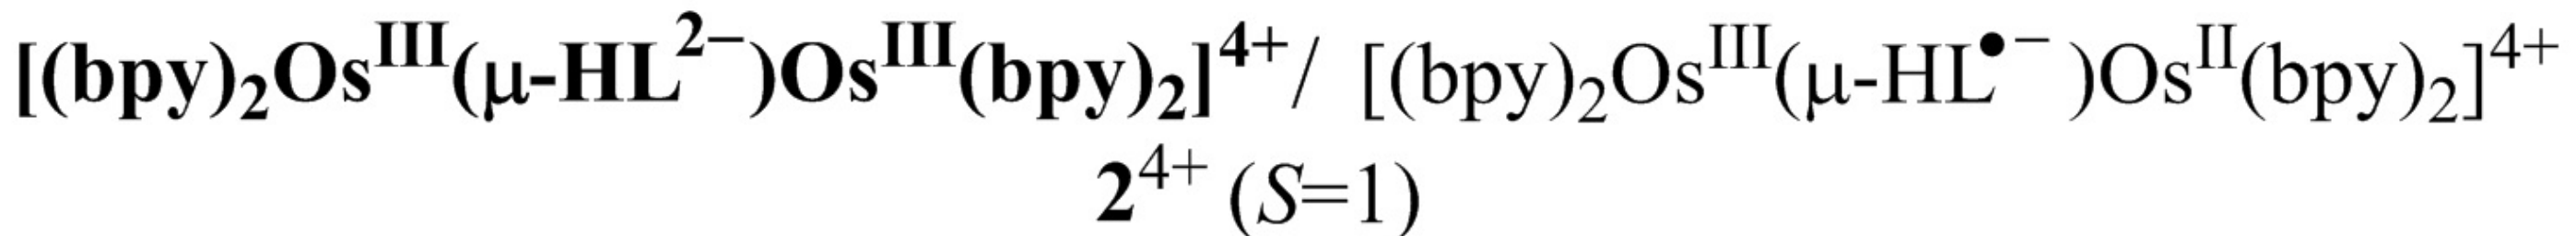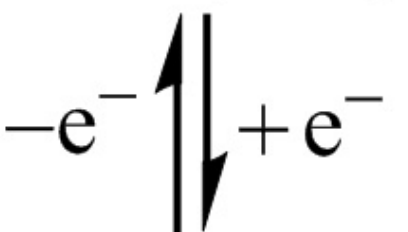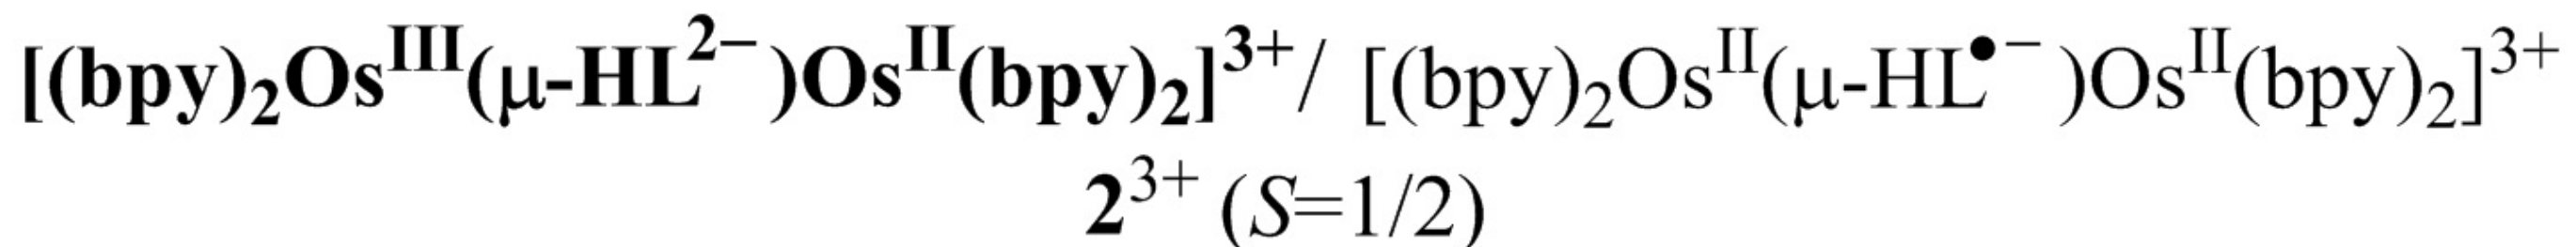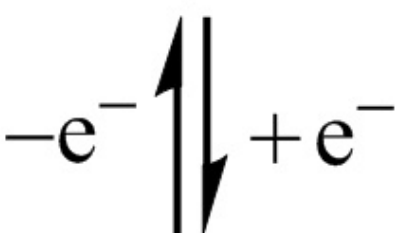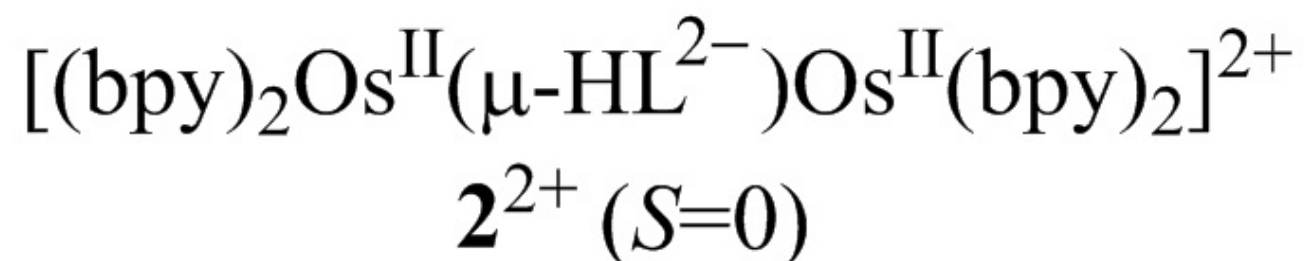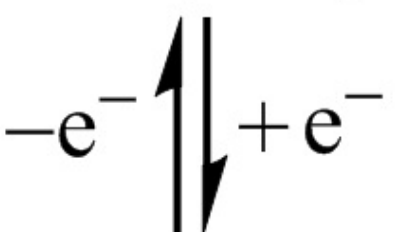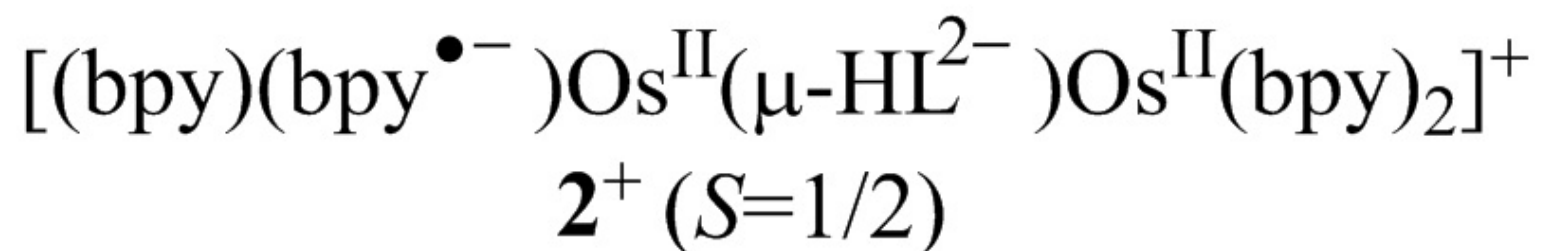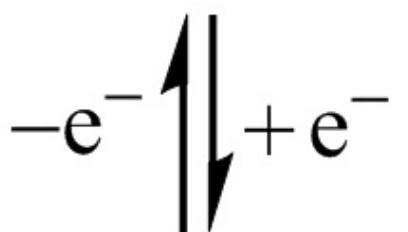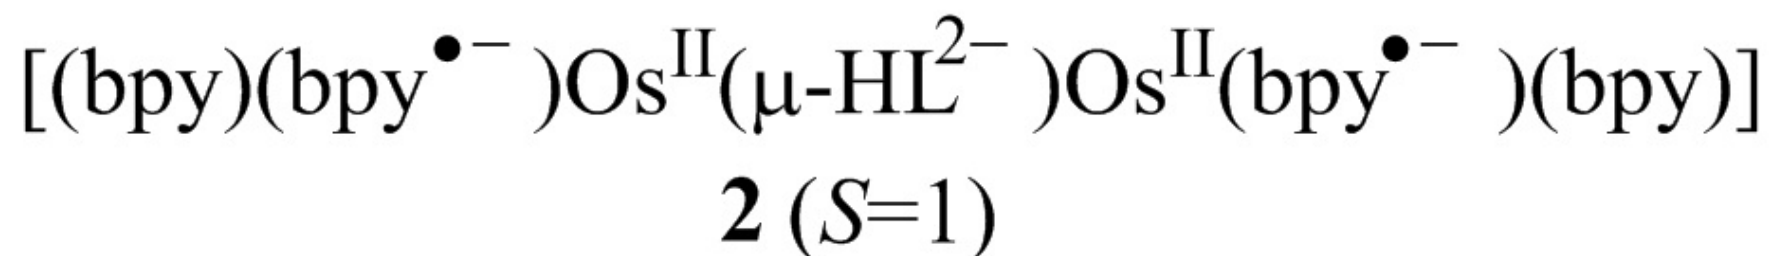

Supplement: c4dt01821d5.pdf [file c4dt01821d5.pdf]
